# Supplementary material for: Allosteric mechanism of the circadian protein Vivid resolved through Markov state model and machine learning analysis
Source: PubMed Central journal article supplement (PMC6396943; doi:10.1371/journal.pcbi.1006801), 2019-02-19
Supplement: pcbi.1006801.s009.pdf [file pcbi.1006801.s009.pdf]

S1 Table. List of residues in each ML community

|             | Residues                                                                                                                                                                                                                                                                                                                                                                                         |
|-------------|--------------------------------------------------------------------------------------------------------------------------------------------------------------------------------------------------------------------------------------------------------------------------------------------------------------------------------------------------------------------------------------------------|
| Commu.<br>A | H37, T38, L39, Y40, A41, P42, G43                                                                                                                                                                                                                                                                                                                                                                |
| Commu.<br>B | G44, Y45, G49, L64, G65, P66, V67, D68, T69, S70, C108, V118, K119, P120,<br>K121, S122, T123                                                                                                                                                                                                                                                                                                    |
| Commu.<br>C | D46, Q53, R57, P58, P60, Q61, V62, I74, L75, C76, L78, D82, T83, I85, V86, Y87,<br>A88, S89, E90, L93, Y98, S99, A101, E102, V103, L104, G105, R106, N107, F110,<br>S113, P114, R124, K125, V127, D128, S129, N130, T131, I132, N133, T134, M135,<br>K137, A138, R141, N142, A143, V145, Q146, E148, V149, V150, K153, K154,<br>N155, G156, Q157, L163, T164, I166, E171, E174, R176, Y177, C183 |
| Commu.<br>D | I47, M48, Y50, L51, I52, I54, M55, N56, N59, E63, C71, A72, L73, D77, K79, Q80,<br>K81, P84, A91, F92, Y94, M95, T96, G97, N100, R109, L111, Q112, D115, G116,<br>M117, Y126, R136, I139, D140, E144, V147, N151, F152, R158, F159, V160, N161,<br>F162, M165, P167, V168, R169, D170, T172, G173, Y175, S178, M179, G180,<br>F181, Q182, E184                                                   |
