# Supplementary material for: Allosteric mechanism of the circadian protein Vivid resolved through Markov state model and machine learning analysis
Source: PubMed Central journal article supplement (PMC6396943; doi:10.1371/journal.pcbi.1006801), 2019-02-19
Supplement: pcbi.1006801.s010.pdf [file pcbi.1006801.s010.pdf]

S2 Table. Structural comparison (RMSD in Å) among different macrostates. Communities C and D are combined for the analysis.

| RMSD<br>(Å)(community<br>A/B/C and D) | State 3     | State 2     | State 5     | State 7     | State 4     |
|---------------------------------------|-------------|-------------|-------------|-------------|-------------|
| State 3                               |             | 2.7/1.4/1.1 | 4.5/2.3/1.2 | 3.4/2.1/1.0 | 2.2/1.5/1.4 |
| State 2                               | 2.7/1.4/1.1 |             | 3.3/2.3/1.2 | 2.6/2.8/0.9 | 2.3/2.6/1.0 |
| State 5                               | 4.5/2.3/1.2 | 3.3/2.3/1.2 |             | 2.7/3.4/1.1 | 4.4/2.9/1.2 |
| State 7                               | 3.4/2.1/1.0 | 2.6/2.8/0.9 | 2.7/3.4/1.1 |             | 2.4/2.2/0.9 |
| State 4                               | 2.2/1.5/1.4 | 2.3/2.6/1.0 | 4.4/2.9/1.2 | 2.4/2.2/0.9 |             |
